# Supplementary material for: Interactive Visualization Applications in Population Health and Health Services Research: Systematic Scoping Review
Source: PubMed Central journal article supplement (PMC8900899; doi:10.2196/27534), 2022-02-18
Supplement: jmir_v24i2e27534_app3.pdf [file jmir_v24i2e27534_app3.pdf]

| #  | Author and year               | Analytic capability          |                             |                                               | Goal of the application/ method                  |                         |
|----|-------------------------------|------------------------------|-----------------------------|-----------------------------------------------|--------------------------------------------------|-------------------------|
|    |                               | <i>Descriptive analytics</i> | <i>Predictive analytics</i> | <i>Visual exploration of complex datasets</i> | <i>Knowledge discovery/ exploratory analysis</i> | <i>Decision support</i> |
| 1  | Alibrahim et al. 2014 [38]    | x                            |                             |                                               | x                                                | x                       |
| 2  | Barrento et al. 2017 [39]     | x                            | x                           |                                               | x                                                | x                       |
| 3  | Basole et al. 2015 [40]       | x                            |                             |                                               | x                                                | x                       |
| 4  | Becnel et al. 2019 [41]       | x                            |                             | x                                             | x                                                | x                       |
| 5  | Benitez et al. 2017 [42]      | x                            |                             | x                                             | x                                                | x                       |
| 6  | Ben Ramadan et al. 2017 [43]  | x                            |                             | x                                             | x                                                | x                       |
| 7  | Ben Ramadan et al. 2018 [44]  | x                            |                             | x                                             | x                                                |                         |
| 8  | Bieh-Zimmert et al. 2013 [45] | x                            |                             | x                                             | x                                                | x                       |
| 9  | Bjarnadottir et al. 2016 [46] | x                            |                             | x                                             | x                                                | x                       |
| 10 | Brownstein et al. 2010 [47]   | x                            |                             |                                               | x                                                |                         |
| 11 | Cesario et al. 2012 [48]      | x                            |                             | x                                             | x                                                |                         |
| 12 | Chui et al. 2011 [49]         | x                            |                             | x                                             | x                                                | x                       |
| 13 | Haque et al. 2014 [50]        | x                            |                             |                                               | x                                                | x                       |
| 14 | Happe et al. 2018 [51]        | x                            |                             | x                                             | x                                                | x                       |
| 15 | Henley et al. 2018 [52]       | x                            |                             |                                               | x                                                | x                       |
| 16 | Hosseinpour et al. 2018 [53]  | x                            |                             | x                                             | x                                                | x                       |
| 17 | Hsu et al. 2018 [54]          | x                            |                             | x                                             | x                                                | x                       |
| 18 | Iyer et al. 2017 [55]         |                              |                             | x                                             | x                                                |                         |
| 19 | Jia et al. 2015 [56]          | x                            |                             |                                               | x                                                | x                       |

|    |                                |   |   |   |   |   |
|----|--------------------------------|---|---|---|---|---|
| 20 | Kaushal et al. 2018 [57]       | x |   | x | x | x |
| 21 | Kirtland et al. 2014 [58]      | x |   |   | x | x |
| 22 | Ko et al. 2018 [59]            | x |   |   | x | x |
| 23 | Krause et al. 2015 [60]        | x |   | x | x |   |
| 24 | Kubasek et al. 2013 [61]       | x |   | x | x | x |
| 25 | Lanzarone et al. 2017 [62]     | x |   | x | x | x |
| 26 | Lopez-DeFede et al. 2011 [63]  | x |   | x | x |   |
| 27 | Mahler et al. 2015 [64]        | x |   | x | x | x |
| 28 | Marshall et al. 2017 [65]      | x |   | x | x | x |
| 29 | Martinez et al. 2016 [66]      | x |   | x | x |   |
| 30 | Mitrpanont et al. 2017 [67]    | x |   |   | x | x |
| 31 | Moni et al. 2015 [68]          | x | x | x | x | x |
| 32 | Monsen et al. 2015 [69]        | x |   |   | x | x |
| 33 | Monsivais et al. 2018 [70]     | x |   |   | x | x |
| 34 | Mozumder et al. 2018 [71]      |   | x |   | x |   |
| 35 | Ortiz-Zuazaga et al. 2015 [72] | x |   | x | x | x |
| 36 | Pachauri et al. 2014 [73]      | x |   | x | x | x |
| 37 | Palmer et al. 2019 [74]        | x |   | x | x | x |
| 38 | Pickle et al. 2010 [75]        | x |   | x | x | x |
| 39 | Pike et al. 2017 [76]          | x |   | x | x | x |
| 40 | Podgornik et al. 2007 [77]     | x |   | x | x | x |
| 41 | Pur et al. 2007 [78]           | x |   | x | x | x |

|    |                                      |   |   |   |   |   |
|----|--------------------------------------|---|---|---|---|---|
| 42 | Raghupathi et al. 2018 [79]          | x |   |   | x |   |
| 43 | Ratwani et al. 2015 [80]             | x |   | x | x | x |
| 44 | Rodriguez-Fernandez et al. 2016 [81] | x |   | x | x | x |
| 45 | Rowlingson et al. 2013 [82]          | x |   | x | x | x |
| 46 | Semple et al. 2013 [83]              | x |   | x | x | x |
| 47 | Shen et al. 2018 [84]                | x |   |   | x | x |
| 48 | Sims et al. 2011 [85]                |   |   | x | x | x |
| 49 | Sopan et al. 2012 [86]               | x |   | x | x | x |
| 50 | Toyoda et al. 2015 [87]              | x |   |   | x | x |
| 51 | Tsoi et al. 2018 [88]                | x |   | x | x | x |
| 52 | Valdiserri et al. 2018 [89]          | x |   | x | x | x |
| 53 | van der Corput et al. 2014 [90]      | x |   | x | x | x |
| 54 | Wang et al. 2011 [91]                | x |   | x | x | x |
| 55 | Wang et al. 2018 [92]                | x |   | x | x | x |
| 56 | Zhang et al. 2011 [93]               | x | x |   | x | x |
|    | <b>x=applicable category</b>         |   |   |   |   |   |
